# Supplementary material
Source: Springer Nature journal article supplement (https://www.springermedizin.de/resource/supplementary/12894_2008_121_MOESM4_ESM.pdf/9513966)

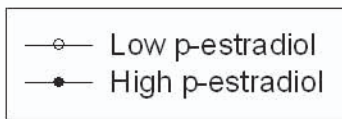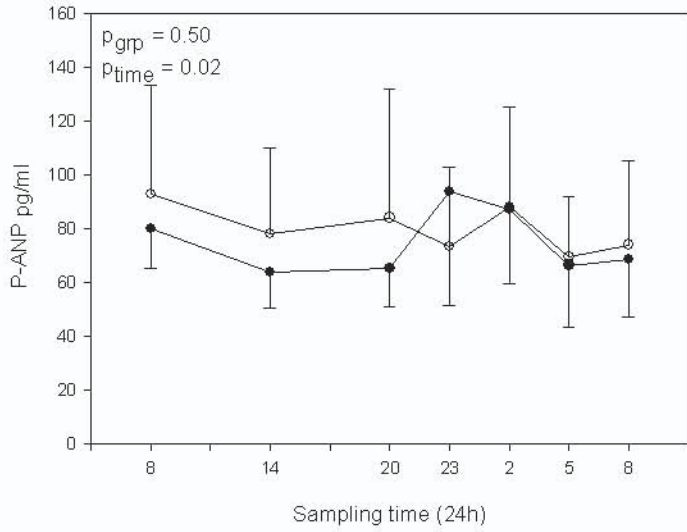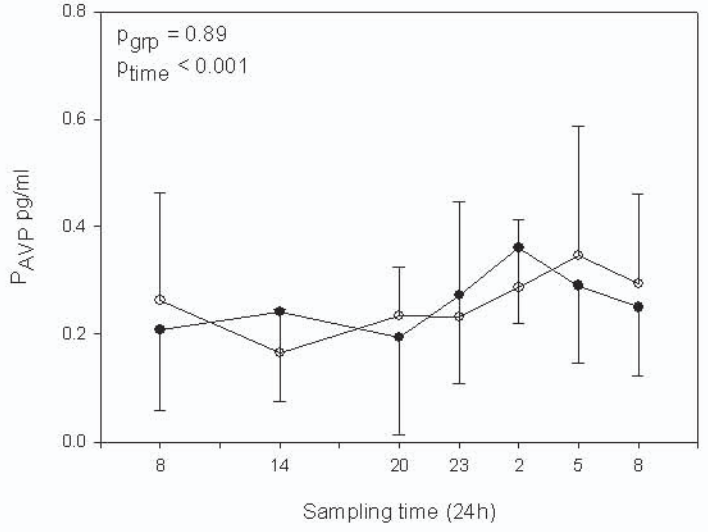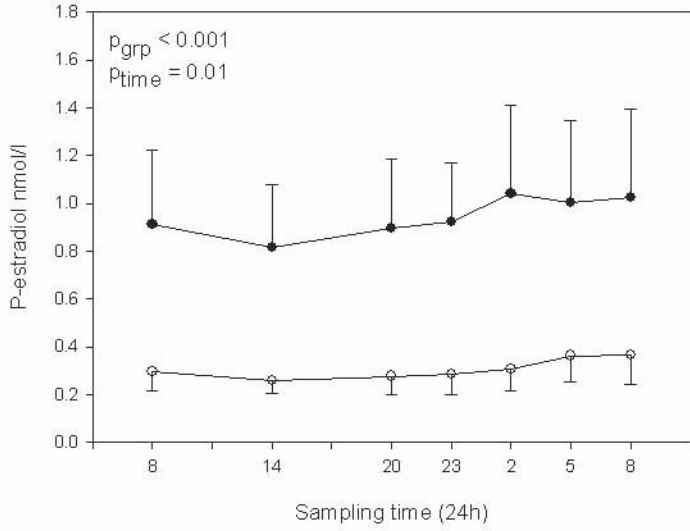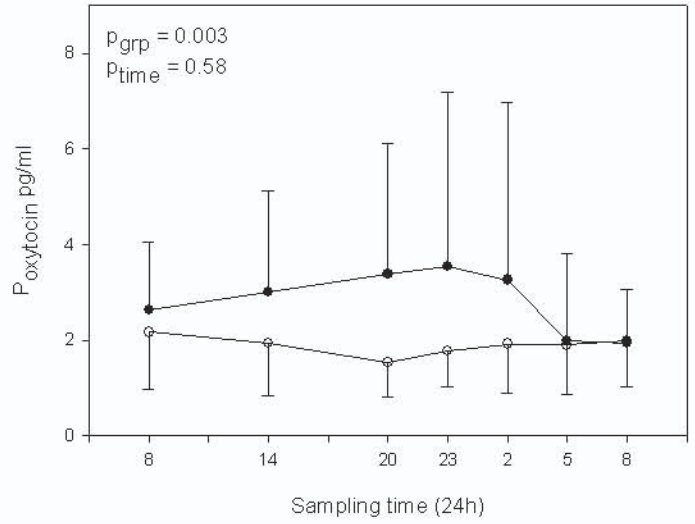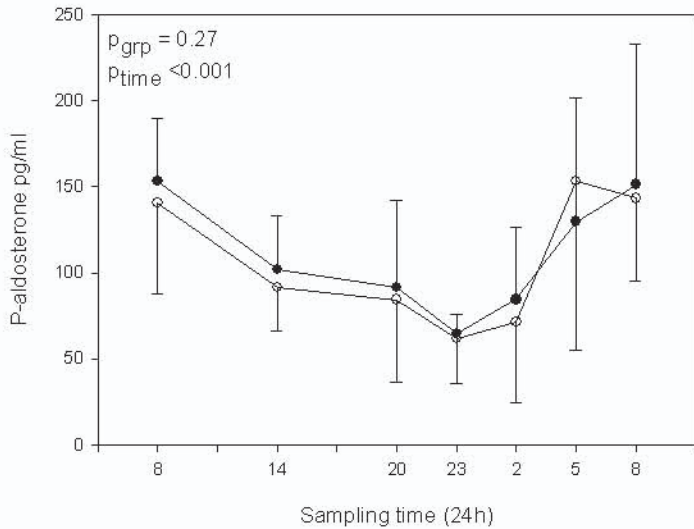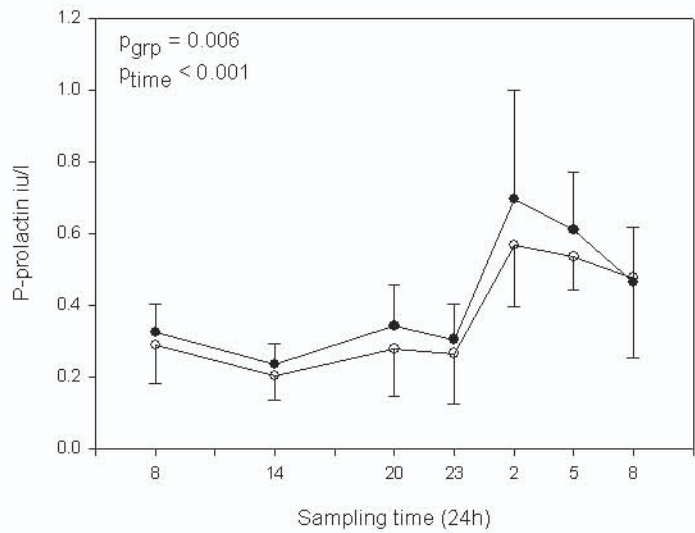

Supplement: MOESM4 [file 9513966]
